# Supplementary material for: Mechanical Confinement and DDR1 Signaling Synergize to Regulate Collagen‐Induced Apoptosis in Rhabdomyosarcoma Cells
Source: PubMed Central journal article supplement (PMC9534977; doi:10.1002/advs.202202552), 2022-08-11
Supplement: ADVS-9-2202552-s001.pdf [file ADVS-9-2202552-s001.pdf]

## Supporting Information

for *Adv. Sci.*, DOI 10.1002/adv.202202552

Mechanical Confinement and DDR1 Signaling Synergize to Regulate Collagen-Induced Apoptosis in Rhabdomyosarcoma Cells

*Jordi Gonzalez-Molina\**, *Katharina Miria Kirchhof*, *Bhavik Rathod*, *Lidia Moyano-Galceran*, *Maria Calvo-Noriega*, *Georgia Kokaraki*, *Astrid Bjørkøy*, *Monika Ehnman*, *Joseph W. Carlson* and *Kaisa Lehti\**

## Supporting Information

### **Mechanical confinement and DDR1 signaling synergize to regulate collagen-induced apoptosis in rhabdomyosarcoma cells**

*Jordi Gonzalez-Molina\**, *Katharina Miria Kirchhof*, *Bhavik Rathod*, *Lidia Moyano-Galceran*, *Maria Calvo-Noriega*, *Georgia Kokaraki*, *Astrid Bjørkøy*, *Monika Ehnman*, *Joseph W. Carlson*, *Kaisa Lehti\**

| <b>Fibrillar collagens</b>                    |                  |                  |                                |                  |                                |                  |
|-----------------------------------------------|------------------|------------------|--------------------------------|------------------|--------------------------------|------------------|
|                                               | <b>TCGA-SARC</b> |                  | <b>Osteosarcoma (GSE21257)</b> |                  | <b>Rhabdomyosarcoma (ITCC)</b> |                  |
| <b>Gene</b>                                   | <b>P value</b>   | <b>Prognosis</b> | <b>P value</b>                 | <b>Prognosis</b> | <b>P value</b>                 | <b>Prognosis</b> |
| <b>COL1A1</b>                                 | 0.62             | NA               | 0.95                           | NA               | 0.48                           | NA               |
| <b>COL1A2</b>                                 | 0.62             | NA               | 0.91                           | NA               | 0.37                           | NA               |
| <b>COL2A1</b>                                 | 0.28             | NA               | 0.74                           | NA               | 0.36                           | NA               |
| <b>COL3A1</b>                                 | 0.21             | NA               | 0.34                           | NA               | 0.01                           | Favorable        |
| <b>COL5A1</b>                                 | 0.13             | NA               | 0.94                           | NA               | 0.11                           | NA               |
| <b>COL5A2</b>                                 | 0.84             | NA               | 0.83                           | NA               | 0.11                           | NA               |
| <b>COL5A3</b>                                 | 0.85             | NA               | 0.31                           | NA               | 0.046                          | Favorable        |
| <b>COL11A1</b>                                | 0.044            | unfavorable      | 0.0105                         | unfavorable      | 0.33                           | NA               |
| <b>COL11A2</b>                                | 0.023            | unfavorable      | 0.57                           | NA               | 0.2                            | NA               |
| <b>COL24A1</b>                                | 0.0016           | unfavorable      | 0.48                           | NA               | 0.73                           | NA               |
| <b>COL27A1</b>                                | 0.0037           | unfavorable      | 0.16                           | NA               | 0.054                          | NA               |
| <b>Collagen biosynthesis and crosslinking</b> |                  |                  |                                |                  |                                |                  |
|                                               | <b>TCGA-SARC</b> |                  | <b>Osteosarcoma (GSE21257)</b> |                  | <b>Rhabdomyosarcoma (ITCC)</b> |                  |
| <b>Gene</b>                                   | <b>P value</b>   | <b>Prognosis</b> | <b>P value</b>                 | <b>Prognosis</b> | <b>P value</b>                 | <b>Prognosis</b> |
| <b>ADAMTS3</b>                                | 0.49             | NA               | 0.0052                         | unfavorable      | 0.25                           | NA               |
| <b>ARG1</b>                                   | 0.72             | NA               | 0.52                           | NA               | 0.93                           | NA               |
| <b>BMP1</b>                                   | 0.45             | NA               | 0.61                           | NA               | 0.024                          | Favorable        |
| <b>FMOD</b>                                   | 0.013            | Favorable        | 0.4                            | NA               | 0.63                           | NA               |
| <b>LOX</b>                                    | 0.034            | Unfavorable      | 0.5                            | NA               | 1                              | NA               |
| <b>LOXL2</b>                                  | 0.023            | Unfavorable      | 0.71                           | NA               | 0.0496                         | Favorable        |
| <b>P3H3</b>                                   | 0.15             | NA               | 0.88                           | NA               | 0.0297                         | Favorable        |
| <b>P3H4</b>                                   | 0.0024           | Unfavorable      | 1                              | NA               | 0.0288                         | Favorable        |
| <b>PLOD1</b>                                  | 0.0089           | Unfavorable      | 0.3                            | NA               | 0.74                           | NA               |
| <b>PLOD2</b>                                  | 0.019            | Unfavorable      | 0.16                           | NA               | 0.74                           | NA               |
| <b>PLOD3</b>                                  | 0.38             | NA               | 0.97                           | NA               | 0.36                           | NA               |
| <b>RCN3</b>                                   | 0.083            | NA               | 0.31                           | NA               | 0.58                           | NA               |
| <b>SERPINH1</b>                               | 0.097            | NA               | 1                              | NA               | 0.2                            | NA               |
| <b>TRAM2</b>                                  | 0.23             | NA               | 0.17                           | NA               | 0.21                           | NA               |
| NA: not applicable/ unknown                   |                  |                  |                                |                  |                                |                  |

**Table S1.** Prognosis value of fibrillar collagen and collagen biosynthesis genes in sarcoma.

| Cell line                   | Histology | Fusion                              | P53 status | Metastasis | Location     | Age (years) |
|-----------------------------|-----------|-------------------------------------|------------|------------|--------------|-------------|
| RD                          | Embryonal | Negative                            | Mutant     | Primary    | Pelvis       | 7           |
| RH30                        | Alveolar  | Positive                            | Mutant     | Metastasis | B. Marrow    | 16          |
| RH36                        | Embryonal | Negative                            | Wild type  | Metastasis | L. Node      | 15          |
| RMS                         | Alveolar  | Positive                            | NA         | Metastasis | Pleural eff. | 14          |
| RMSYM                       | Embryonal | Multiple chromosomal rearrangements | Mutant     | Primary    | Abdomen      | 2           |
| RUCH2                       | Botryoid  | Multiple chromosomal rearrangements | NA         | Primary    | Vagina       | 1           |
| NA: not applicable/ unknown |           |                                     |            |            |              |             |

**Table S2.** Rhabdomyosarcoma cell line details.

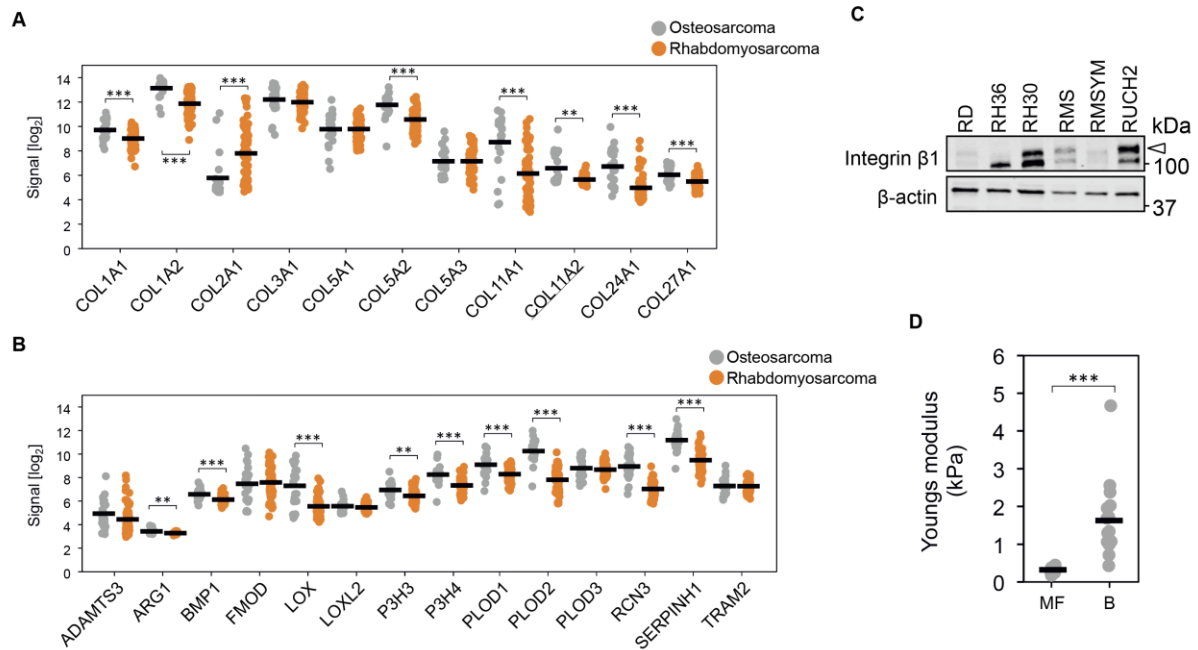

**Figure S1.** Expression of collagen-related gene and integrin  $\beta 1$  protein in RMS and stiffness of collagen matrices with distinct microarchitecture. **A, B,** Gene expression of fibrillar collagens (A) and collagen biosynthesis-related genes (B) in osteosarcoma (OS;  $n=21$ ; GSE87437) and rhabdomyosarcoma (RMS;  $n=58$ ; GSE66533) tumors. **C,** Integrin  $\beta 1$  protein expression in RMS cell lines. Arrowhead indicates the band corresponding to mature, fully glycosylated, integrin  $\beta 1$ . **D,** Young's moduli of microfibrillar-collagen (MF;  $n=17$  spots) and bundle-collagen (B;  $n=16$  spots). Each data point is shown, bars indicate average Young's moduli. \*\*\*  $p < 0.001$ , \*\*  $p < 0.01$ .

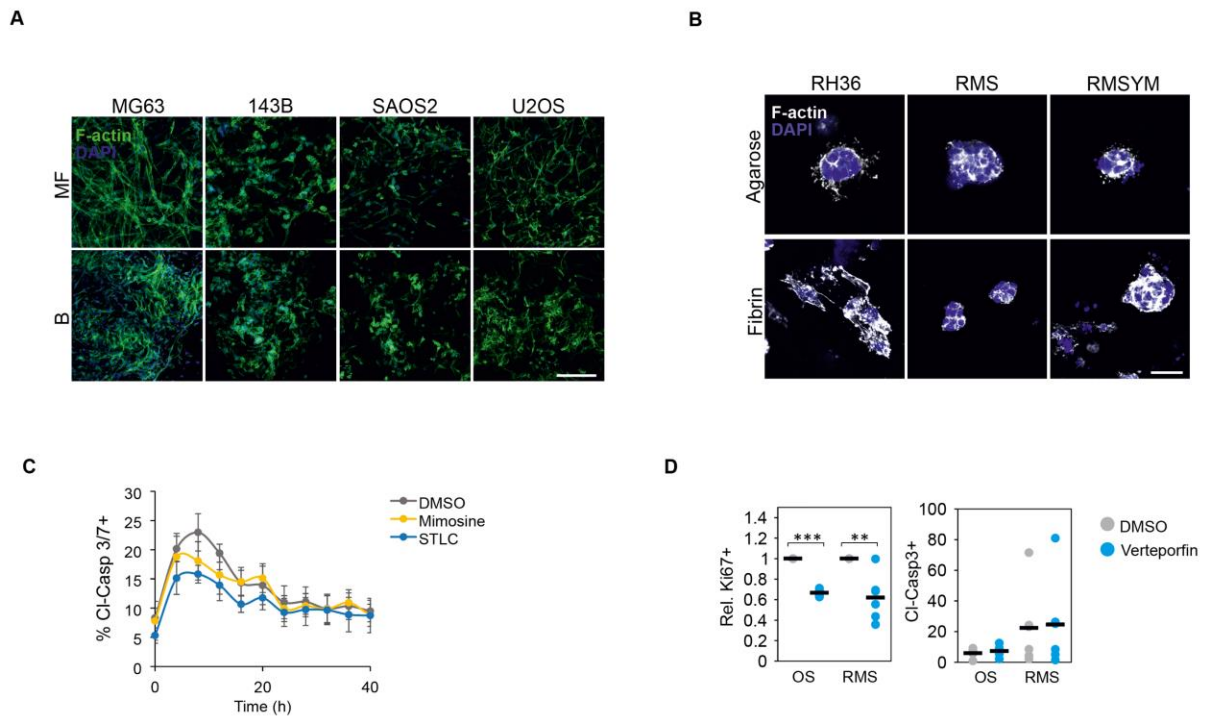

**Figure S2.** 3D collagen matrices induce apoptosis in RMS cell lines independently of cell cycle and YAP activation. **A**, Representative images of OS cell lines embedded in microfibrillar (MF)- or bundled (B)-collagen for 4 days showing similar cell density in both matrices. Scale bar indicates 50  $\mu\text{m}$ . **B**, Collagen-apoptotic RMS cell lines form spheroids in soft agarose and fibrin matrices after 4 days. Scale bar indicates 10  $\mu\text{m}$ . **C**, Blocking cell cycle progression does not alter apoptosis dynamics induced by 3D MF-collagen on RH36 cells (n=3 biological repeats). **D**, Treatment with the YAP-TEAD inhibitor verteporfin reduces proliferation but does not alter apoptosis in cells embedded in 3D MF-collagen for 24 h. Each data point indicates average (n=3 biological repeats) of a cell line (OS n=4 cell lines, RMS n=6 cell lines). \*\*\*  $p < 0.001$ , \*\*  $p < 0.01$ .

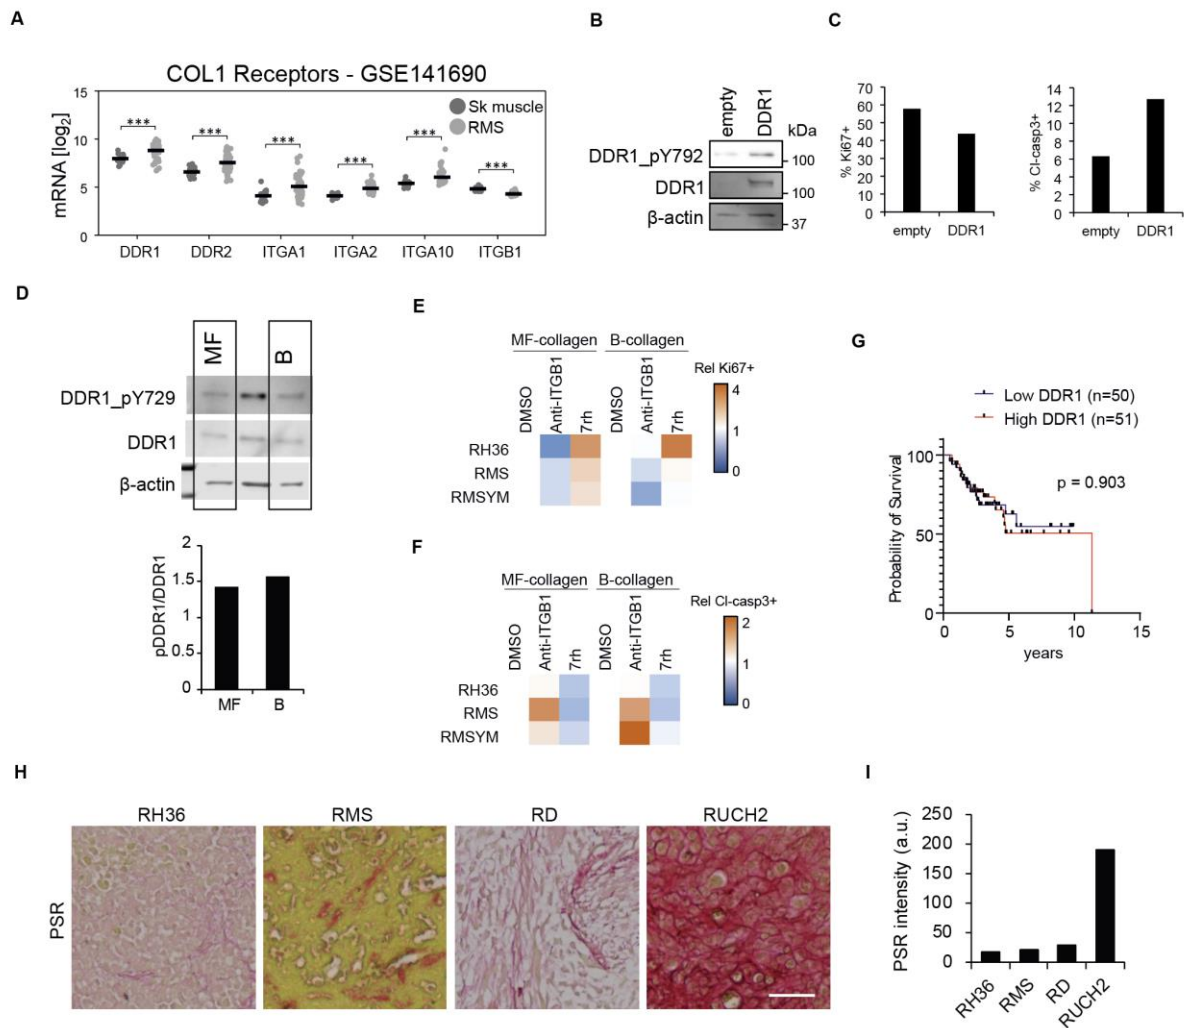

**Figure S3.** Inhibiting DDR1 reduces and blocking integrin  $\beta$ 1 enhances the apoptotic response to 3D collagen in RMS cells. **A**, Comparison of collagen I receptor gene expression between skeletal muscle (Sk muscle; n=9) and rhabdomyosarcoma (RMS) tumors (n=66) showing a general increase except for ITGB1 in tumors tissues. **B**, Western blot analysis showing the efficiency of DDR1 overexpression in RH30 cells. **C**, Effect of DDR1 overexpression on RH30 cell proliferation (Ki67+) and apoptosis (Cleaved-caspase 3+) after 24 h embedding in 3D microfibrillar (MF)-collagen (n=3 technical repeats). **D**, Uncut blots and quantification of phosphorylated DDR1 to DDR1 ratio in RMSYM cells adhered to MF- or bundled (B)-collagen for 24 h (n=2 biological repeats). **E**, **F**, Variation in cell proliferation (**E**) and apoptosis (**F**) in collagen-apoptotic RMS cell lines embedded in 3D MF-collagen for 24 h upon the indicated treatment showing opposite effects of DDR1 and integrin  $\beta$ 1 inhibition (n=3 biological repeats). **G**, Kaplan-Meier survival curves of RMS tumors expressing low (n=50) or high (n=51) DDR1 (from the ITCC cohort) showing no difference

between these groups. **H, I**, Representative images (H) and quantification (I) of collagen content (PSR staining) in rhabdomyosarcoma tumor xenografts of collagen-apoptotic and collagen-proliferative cell lines. Scale bar 50  $\mu\text{m}$ . \*\*\*  $p < 0.001$ .



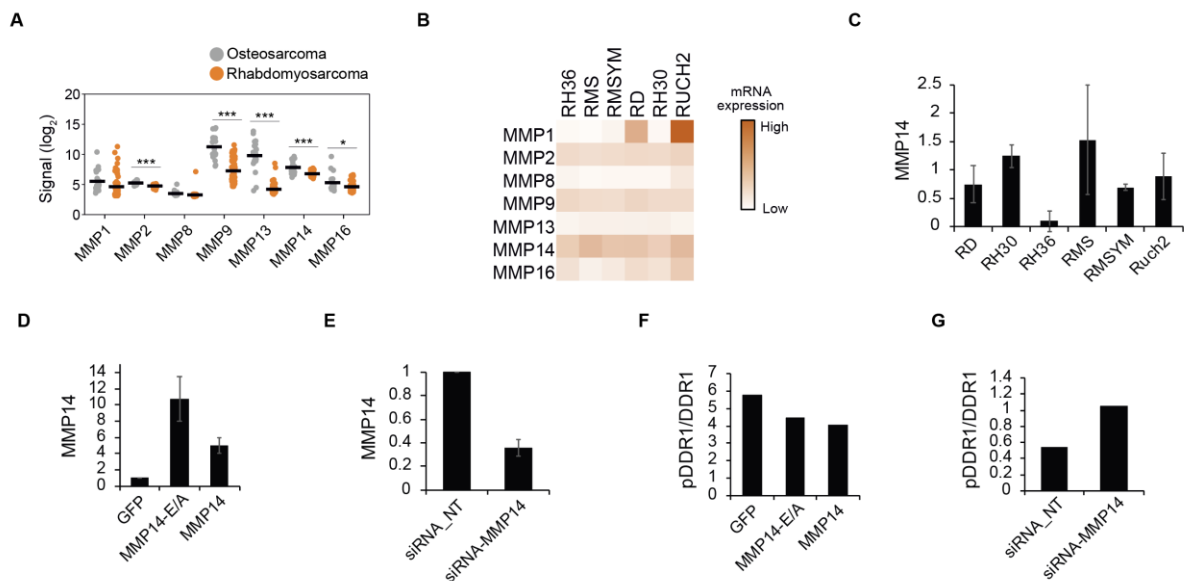

**Figure S4.** Matrix metalloproteinase gene expression is relatively low in RMS cells. **A**, Comparison of collagen-proteolytic matrix metalloproteinase (MMP) gene expression between OS (n=21; GSE87437) and RMS (n=58; GSE66533) tumors. **B**, Gene expression of collagen-proteolytic MMPs in RMS cell lines. **C**, Quantification of MMP14 protein levels per cell line (n=3 biological repeats). **D**, **E**, Quantification of MMP14 levels in RH36 cells transfected with control (GFP), catalytically inactive MMP14 mutant (MMP14-E/A) and wild-type MMP14 (MMP14) (D, n=3 biological repeats) and in RH30 cells after MMP14 knockdown (siRNA\_MMP14) or non-targeting control (siRNA\_NT) (E, n=3 biological repeats). **F**, **G**, Quantification of phosphorylated DDR1 to DDR1 ratio of cells from (D) (F, n=1) and (E) (G, n=1). Bar graphs represent average ( $\pm$ S.E.M.).

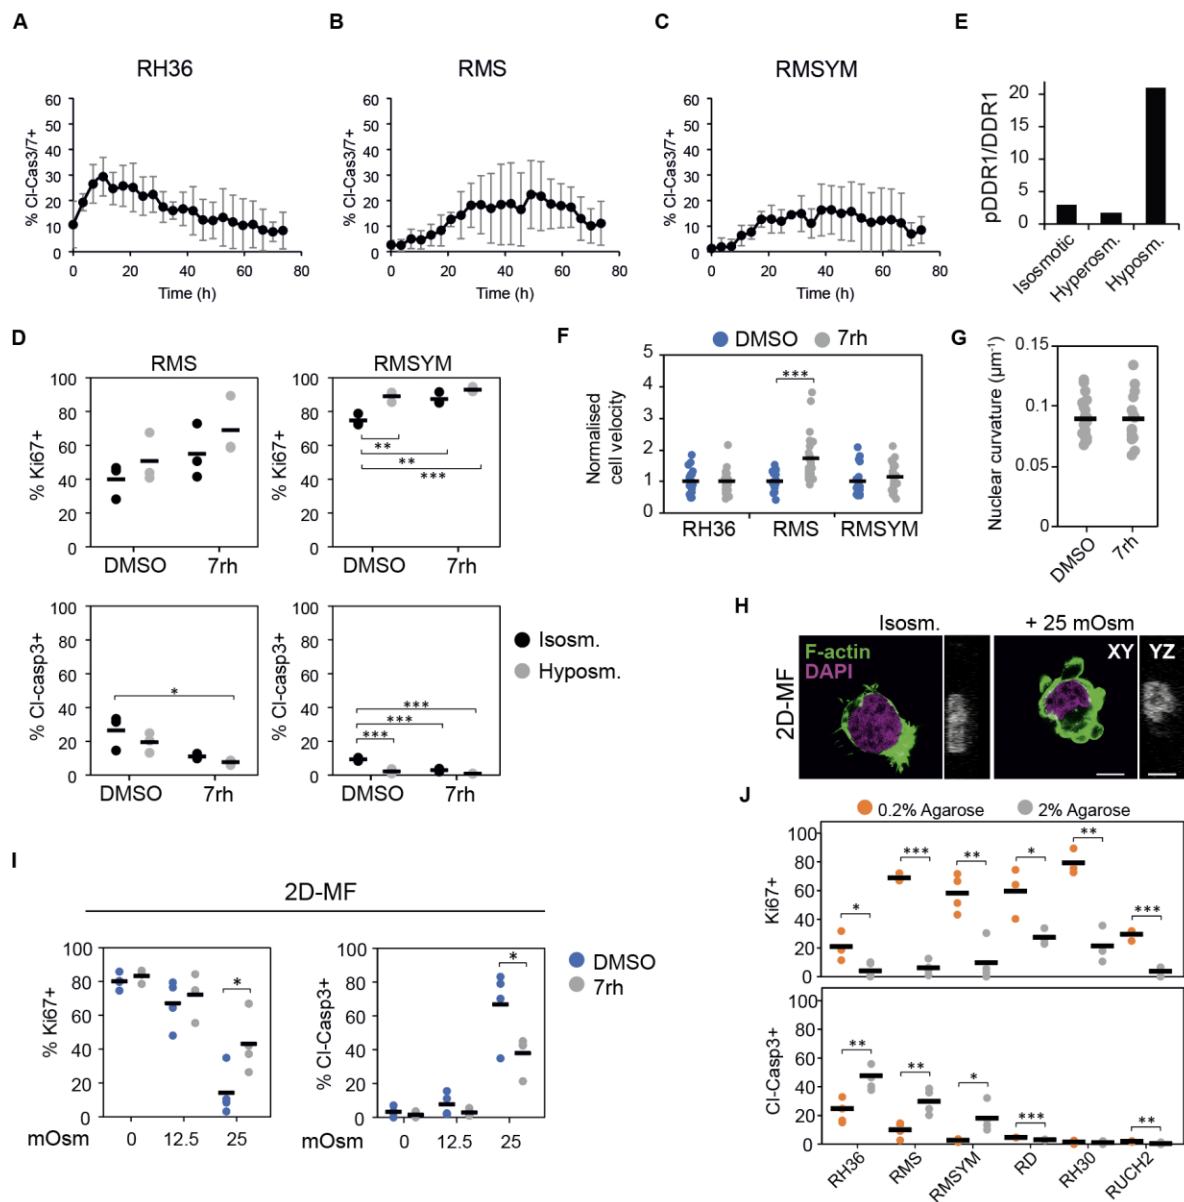

**Figure S5.** Mechanical confinement synergizes with DDR1 signaling to induce apoptosis in RMS cells. **A-C**, Dynamics of apoptosis induced by MF-collagen in RH36 (**A**), RMS (**B**), and RMSYM (**C**) cells ( $n=5$  technical repeats). **D**, Hyposmotic pressure and DDR1 inhibition synergize to enhance proliferation and reduce apoptosis in RMS and RMSYM cells embedded in 3D microfibrillar (MF)-collagen for 24 h ( $n=3$  biological repeats). **E**, Quantification of phosphorylated DDR1 to DDR1 ratio in RH36 cells adhered to 2D MF-collagen for 6 h ( $n=2$  biological repeats). **F**, Cell velocity normalized to control (DMSO) of cells embedded in 3D MF-collagen during the first 5 h ( $n\geq 21$  cells). **G**, Nuclear curvature of RH36 cells embedded in 3D MF-collagen for 3.5 h ( $n\geq 14$  cells). **H**, Representative images of

RH36 cells on 2D MF-collagen gels subjected to distinct osmotic pressures showing membrane blebbing and changes in nuclear morphology in hyperosmotic conditions. Scale bars indicates 10  $\mu\text{m}$ . **I**, Inhibition of DDR1 reduces apoptosis in RMS cells seeded on 2D MF-collagen subjected to hyperosmotic conditions (n=3 biological repeats). **J**, Apoptosis is enhanced in collagen-apoptotic RMS cells lines embedded in high density agarose compared to low density agarose hydrogels after 24 h (n=3). \*\*\*  $p < 0.001$ , \*\*  $p < 0.01$ , \*  $p < 0.05$ .

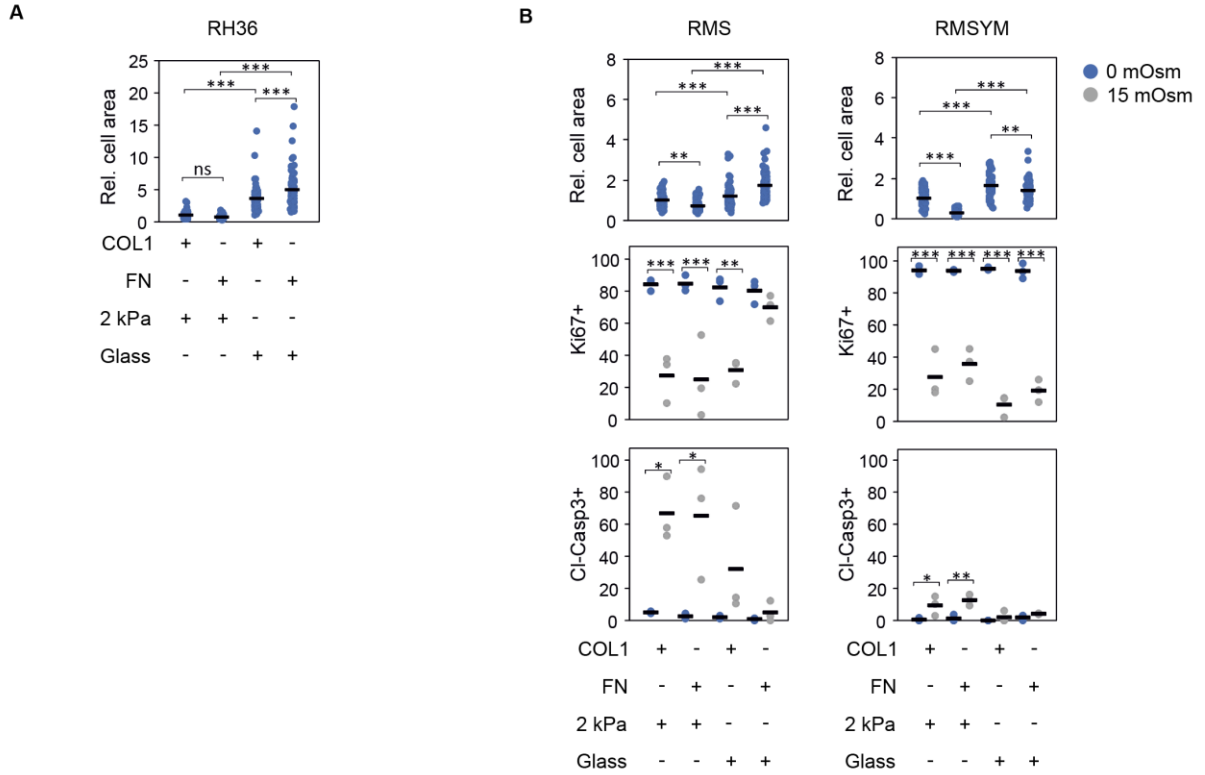

**Figure S6.** Enhanced cell adhesion reduces hyperosmotic pressure-induced apoptosis. **A**, Effect of adhesion to distinct substrates on RH36 cell spreading ( $n \geq 74$  cells). **B**, Effect of cell adhesion to distinct substrates on RMS and RMSYM cell spreading (top panels;  $n \geq 75$  cells), proliferation (middle panels;  $n=3$  biological repeats), and apoptosis (bottom panels;  $n=3$  biological repeats). \*\*\*  $p < 0.001$ , \*\*  $p < 0.01$ , \*  $p < 0.05$ .

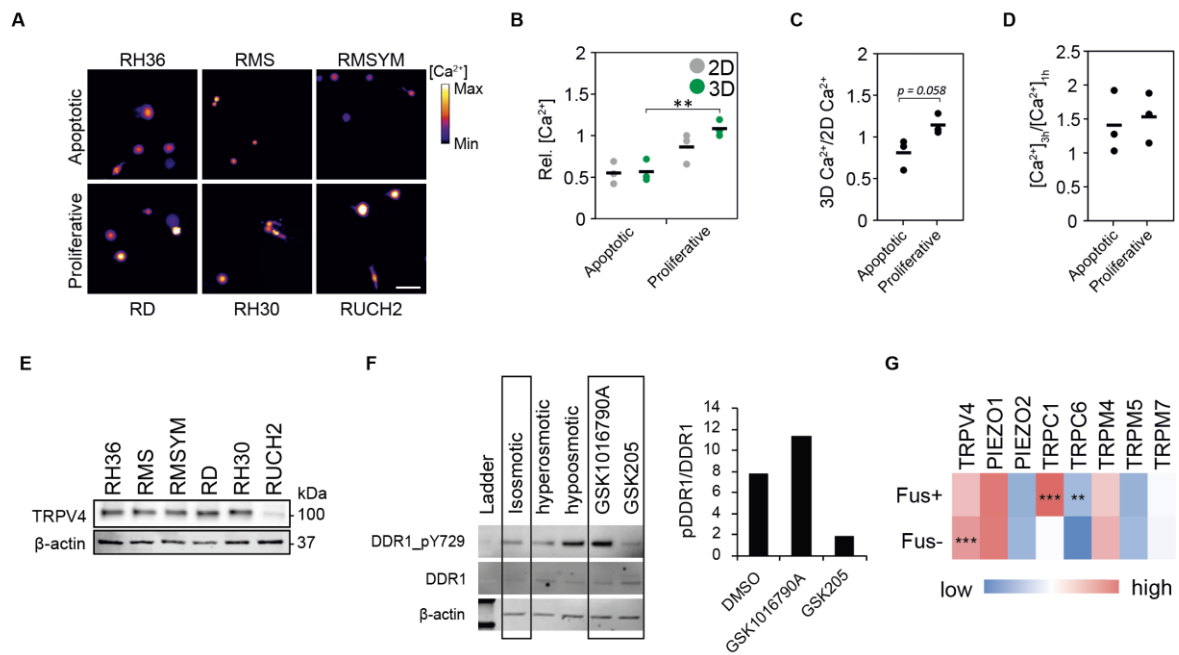

**Figure S7.** Intracellular calcium content and TRPV4 expression comparison in RMS cell lines. **A**, Representative images of relative calcium content in RMS cell lines embedded in 3D microfibrillar (MF)-collagen for 3 h. Scale bar indicates 20  $\mu\text{m}$ . **B-D**, Comparison of the relative calcium content (B), or the ratio of calcium content in cells on 2D and in 3D MF-collagen (C) after 3 h or the difference in calcium content between 1 h and 3 h after embedding (D) in collagen-apoptotic and collagen-proliferative cell lines. Each data point indicates the average of one cell line and bars show the average of each group. **E**, Protein expression of TRPV4 in the distinct RMS cell lines. **F**, Uncut blots and quantification of phosphorylated DDR1 to DDR1 ratio in RH36 cells adhered to MF-collagen for 6 h under the indicated treatments ( $n=1$ ). **G**, Gene expression of mechanosensitive channels in fusion-positive (Fus+) and fusion-negative (Fus-) RMS tumors (ITCC cohort). \*\*\*  $p < 0.001$ , \*\*  $p < 0.01$ .
